# Supplementary material for: Diflunisal and Analogue Pharmacophores Mediating Suppression of Virulence Phenotypes in Staphylococcus aureus
Source: MDPI journal article supplement (doi:10.3390/antibiotics12071180), 2023-07-12
Supplement: s1 [file s1]

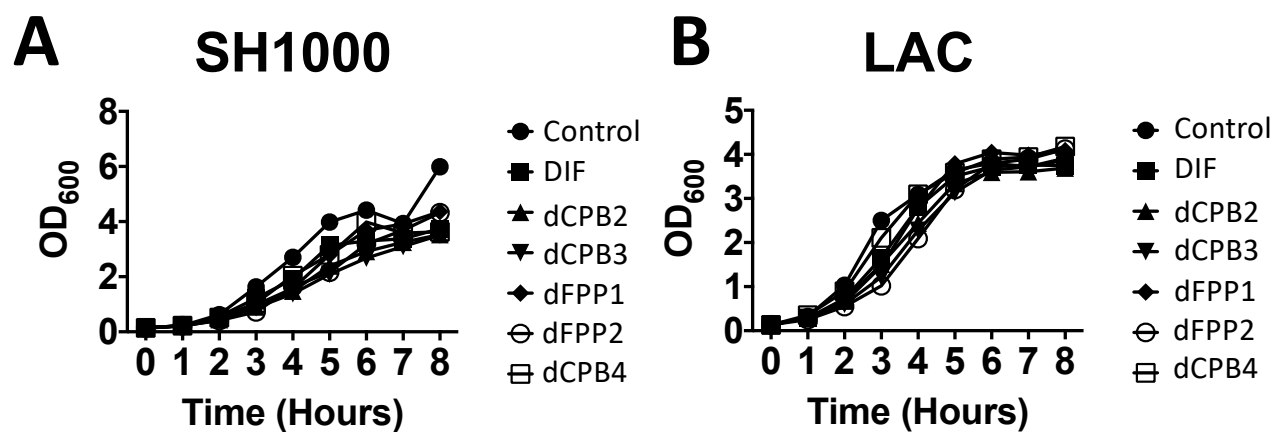

**Supplemental Figure S1.** DIF and structural analogues do not impact growth in *S. aureus* strains. Strains were grown in tryptic soy broth with or without DIF or analogues. Cultures were measure every hour to measure growth.

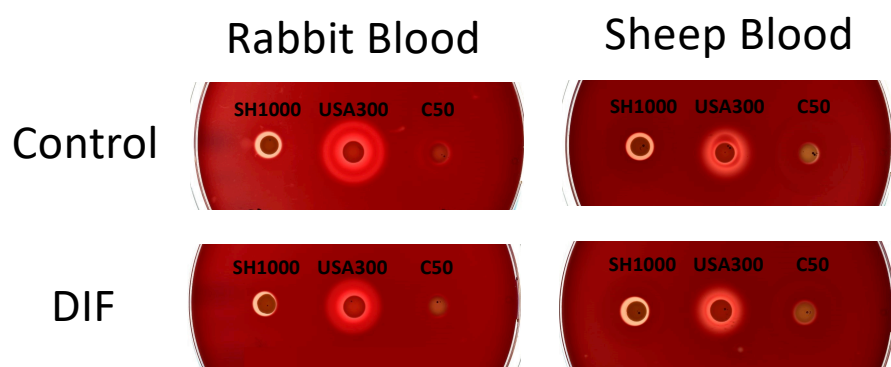

**Supplemental Figure S2.** Hemolysis assays performed on rabbit vs. sheep blood agar showed similar reductions when treated with DIF.

|                       |       | <i>S. aureus</i> Strain |       |       |       |       |       |       |       |
|-----------------------|-------|-------------------------|-------|-------|-------|-------|-------|-------|-------|
|                       |       | MSSA                    | COL   | LAC   | MW2   | Mu3   | Mu50  | C15   | C16   |
| Hydroxy Phenyl BZA    | OHPB1 | 0.975                   | 0.529 | 0.691 | 0.109 | 0.688 | 0.862 | 0.084 | 0.481 |
|                       | OHPB2 | 0.079                   | 0.427 | 0.177 | 0.059 | 0.375 | 0.598 | 0.018 | 0.420 |
| Fluorophenyl BA       | FPB1  | 0.252                   | 0.627 | 0.223 | 0.137 | 0.067 | 0.240 | 0.047 | 0.051 |
|                       | dFPB1 | 0.119                   | 0.037 | 0.963 | 0.679 | 0.082 | 0.295 | 0.658 | 0.039 |
| Difluorophenyl BZA    | dFPB2 | 0.085                   | 0.447 | 0.867 | 0.162 | 0.156 | 0.289 | 0.459 | 0.451 |
|                       | dFPB3 | 0.013                   | 0.129 | 0.013 | 0.088 | 0.008 | 0.021 | 0.011 | 0.001 |
|                       | dFPB4 | 0.225                   | 0.166 | 0.343 | 0.236 | 0.520 | 0.912 | 0.070 | 0.585 |
|                       | dFPB5 | 0.128                   | 0.384 | 0.071 | 0.034 | 0.020 | 0.050 | 0.011 | 0.021 |
|                       | dFPB6 | 0.008                   | 0.442 | 0.013 | 0.003 | 0.016 | 0.025 | 0.014 | 0.069 |
| Difluorophenyl Phenol | dFPP1 | 0.685                   | 0.689 | 0.021 | 0.765 | 0.173 | 0.361 | 0.188 | 0.731 |
|                       | dFPP2 | 0.084                   | 0.308 | 0.073 | 0.370 | 0.884 | 0.537 | 0.170 | 0.654 |
| Dichlorophenyl BZA    | dCPB1 | 0.213                   | 0.189 | 0.074 | 0.273 | 0.163 | 0.052 | 0.028 | 0.050 |
|                       | dCPB2 | 0.089                   | 0.050 | 0.006 | 0.059 | 0.015 | 0.028 | 0.008 | 0.003 |
|                       | dCPB3 | 0.465                   | 0.089 | 0.452 | 0.459 | 0.378 | 0.463 | 0.175 | 0.934 |
|                       | dCPB4 | 0.255                   | 0.142 | 0.012 | 0.612 | 0.198 | 0.049 | 0.021 | 0.001 |
|                       | dCPB5 | 0.481                   | 0.607 | 0.995 | 0.104 | 0.790 | 0.926 | 0.393 | 0.393 |
|                       | dCPB6 | 0.013                   | 0.070 | 0.873 | 0.091 | 0.997 | 0.826 | 0.553 | 0.996 |
|                       | dCPB7 | 0.004                   | 0.710 | 0.238 | 0.093 | 0.840 | 0.653 | 0.746 | 0.733 |
| BZA                   | BZA   | 0.005                   | 0.404 | 0.290 | 0.038 | 0.102 | 0.372 | 0.041 | 0.188 |
| Dichloro BZA          | dCB1  | 0.018                   | 0.459 | 0.275 | 0.067 | 0.451 | 0.897 | 0.124 | 0.426 |
|                       | dCB2  | 0.071                   | 0.367 | 0.323 | 0.042 | 0.734 | 0.681 | 0.038 | 0.412 |
|                       | dCB3  | 0.004                   | 0.260 | 0.352 | 0.004 | 0.544 | 0.469 | 0.006 | 0.346 |
| Difluoro BZA          | dFB1  | 0.038                   | 0.427 | 0.264 | 0.068 | 0.541 | 0.406 | 0.051 | 0.221 |
|                       | dFB2  | 0.009                   | 0.353 | 0.084 | 0.055 | 0.210 | 0.848 | 0.059 | 0.141 |
|                       | dFB3  | 0.032                   | 0.394 | 0.092 | 0.040 | 0.235 | 0.708 | 0.043 | 0.232 |
| Chlorofluoro BZA      | CFB   | 0.027                   | 0.405 | 0.085 | 0.057 | 0.172 | 0.246 | 0.066 | 0.068 |

## Hemolysis P-values: DIF vs. Analogues

**Supplemental Table S1.** Student's t-test P-values reveal compounds that perform significantly better than DIF. P-values of DIF vs. structural analogues in hemolysis (A), proteolysis (B) and biofilm (C) assays were calculated for significantly different impacts. Values highlighted in green indicate significantly decreased ( $P < 0.05$ ) virulence phenotypes as compared to DIF, whereas values highlighted in red indicate significantly increased ( $P < 0.05$ ) virulence phenotypes.

|                          |       | <i>S. aureus</i> Strain |       |       |       |       |       |       |       |     |
|--------------------------|-------|-------------------------|-------|-------|-------|-------|-------|-------|-------|-----|
|                          |       |                         | MSSA  | COL   | LAC   | MW2   | Mu3   | Mu50  | C15   | C16 |
| Hydroxy Phenyl<br>BZA    | OHPB1 | 1.000                   | 1.000 | 0.316 | 1.000 | 1.000 | 0.184 | 0.423 | 0.423 |     |
|                          | OHPB2 | 1.000                   | 1.000 | 1.000 | 1.000 | 1.000 | 0.349 | 1.000 | 1.000 |     |
| Fluorophenyl BA          | FPB1  | 0.270                   | 0.000 | 0.005 | 0.038 | 0.085 | 0.028 | 0.009 | 0.001 |     |
|                          | dFPB1 | 0.363                   | 0.001 | 0.003 | 0.001 | 1.000 | 0.276 | 0.000 | 0.001 |     |
| Difluorophenyl<br>BZA    | dFPB2 | 0.159                   | 0.029 | 0.006 | 0.014 | 0.003 | 0.049 | 0.001 | 0.002 |     |
|                          | dFPB3 | 0.058                   | 0.003 | 0.000 | 0.000 | 0.000 | 0.009 | 0.000 | 0.000 |     |
|                          | dFPB4 | 1.000                   | 0.001 | 0.000 | 0.000 | 0.138 | 0.127 | 0.068 | 0.008 |     |
|                          | dFPB5 | 0.363                   | 0.004 | 0.000 | 0.001 | 0.046 | 0.090 | 0.017 | 0.076 |     |
|                          | dFPB6 | 0.321                   | 0.003 | 0.000 | 0.003 | 0.007 | 0.042 | 0.002 | 0.001 |     |
| Difluorophenyl<br>Phenol | dFPP1 | 0.229                   | 0.001 | 0.000 | 0.003 | 0.002 | 0.030 | 0.001 | 0.004 |     |
|                          | dFPP2 | 0.271                   | 0.002 | 0.000 | 0.001 | 0.001 | 0.013 | 0.001 | 0.008 |     |
| Dichlorophenyl<br>BZA    | dCPB1 | 0.363                   | 0.005 | 0.001 | 0.106 | 1.000 | 0.079 | 0.001 | 0.115 |     |
|                          | dCPB2 | 1.000                   | 0.363 | 0.219 | 1.000 | 1.000 | 1.000 | 0.258 | 0.363 |     |
|                          | dCPB3 | 1.000                   | 1.000 | 0.180 | 0.363 | 1.000 | 1.000 | 1.000 | 1.000 |     |
|                          | dCPB4 | 1.000                   | 0.374 | 0.374 | 1.000 | 1.000 | 0.374 | 0.374 | 1.000 |     |
|                          | dCPB5 | 1.000                   | 0.090 | 0.005 | 0.022 | 1.000 | 1.000 | 0.092 | 0.096 |     |
|                          | dCPB6 | 1.000                   | 0.214 | 0.026 | 0.104 | 1.000 | 0.222 | 0.252 | 0.423 |     |
|                          | dCPB7 | 1.000                   | 0.004 | 0.036 | 0.031 | 1.000 | 1.000 | 0.185 | 0.188 |     |
| BZA                      | B     | 1.000                   | 0.029 | 0.007 | 0.008 | 0.110 | 0.022 | 0.073 | 0.090 |     |
| Dichloro BZA             | dCB1  | 1.000                   | 0.050 | 0.018 | 0.023 | 0.211 | 0.045 | 0.067 | 0.091 |     |
|                          | dCB2  | 1.000                   | 0.006 | 0.009 | 0.041 | 0.233 | 0.030 | 0.066 | 0.092 |     |
|                          | dCB3  | 1.000                   | 0.050 | 0.005 | 0.012 | 0.117 | 0.009 | 0.068 | 0.156 |     |
| Difluoro BZA             | dFB1  | 1.000                   | 0.056 | 0.005 | 0.006 | 0.142 | 0.059 | 0.122 | 0.143 |     |
|                          | dFB2  | 1.000                   | 0.034 | 0.002 | 0.011 | 0.169 | 0.002 | 0.054 | 0.077 |     |
|                          | dFB3  | 1.000                   | 0.032 | 0.004 | 0.005 | 0.110 | 0.003 | 0.018 | 0.040 |     |
| Chlorofluoro BZA         | CFB   | 1.000                   | 0.012 | 0.014 | 0.015 | 0.158 | 0.008 | 0.045 | 0.073 |     |

## Proteolysis P-values: DIF vs. Analogues

**Supplemental Table S2.** Student's t-test P-values reveal compounds that perform significantly better than DIF. P-values of DIF vs. structural analogues in hemolysis (A), proteolysis (B) and biofilm (C) assays were calculated for significantly different impacts. Values highlighted in green indicate significantly decreased ( $P < 0.05$ ) virulence phenotypes as compared to DIF, whereas values highlighted in red indicate significantly increased ( $P < 0.05$ ) virulence phenotypes.

|                       |       | <i>S. aureus</i> Strain |       |       |       |       |       |       |       |
|-----------------------|-------|-------------------------|-------|-------|-------|-------|-------|-------|-------|
|                       |       | MSSA                    | COL   | LAC   | MW2   | Mu3   | Mu50  | C15   | C16   |
| Hydroxy Phenyl BZA    | OHPB1 | 0.127                   | 0.022 | 0.051 | 0.001 | 0.649 | 0.419 | 0.402 | 0.022 |
|                       | OHPB2 | 0.014                   | 0.017 | 0.081 | 0.005 | 0.317 | 0.136 | 0.160 | 0.055 |
| Fluorophenyl BA       | FPB1  | 0.257                   | 0.053 | 0.010 | 0.025 | 0.011 | 0.015 | 0.064 | 0.111 |
|                       | dFPB1 | 0.110                   | 0.043 | 0.042 | 0.019 | 0.081 | 0.045 | 0.016 | 0.050 |
| Difluorophenyl BZA    | dFPB2 | 0.114                   | 0.011 | 0.001 | 0.077 | 0.039 | 0.018 | 0.137 | 0.124 |
|                       | dFPB3 | 0.053                   | 0.016 | 0.098 | 0.061 | 0.078 | 0.003 | 0.011 | 0.083 |
|                       | dFPB4 | 0.222                   | 0.043 | 0.018 | 0.232 | 0.069 | 0.047 | 0.099 | 0.085 |
|                       | dFPB5 | 0.100                   | 0.001 | 0.148 | 0.099 | 0.012 | 0.021 | 0.032 | 0.028 |
| Difluorophenyl Phenol | dFPB6 | 0.101                   | 0.030 | 0.082 | 0.011 | 0.052 | 0.007 | 0.127 | 0.199 |
|                       | dFPP1 | 0.121                   | 0.009 | 0.128 | 0.059 | 0.291 | 0.018 | 0.518 | 0.674 |
| Dichlorophenyl BZA    | dFPP2 | 0.032                   | 0.012 | 0.180 | 0.019 | 0.112 | 0.094 | 0.101 | 0.018 |
|                       | dCPB1 | 0.092                   | 0.053 | 0.093 | 0.356 | 0.479 | 0.000 | 0.575 | 0.293 |
|                       | dCPB2 | 0.032                   | 0.133 | 0.005 | 0.024 | 0.218 | 0.705 | 0.471 | 0.005 |
|                       | dCPB3 | 0.392                   | 0.069 | 0.696 | 0.053 | 0.552 | 0.003 | 0.092 | 0.112 |
|                       | dCPB4 | 0.130                   | 0.150 | 0.140 | 0.888 | 0.062 | 0.051 | 0.439 | 0.100 |
|                       | dCPB5 | 0.002                   | 0.014 | 0.035 | 0.003 | 0.482 | 0.655 | 0.922 | 0.045 |
|                       | dCPB6 | 0.012                   | 0.056 | 0.112 | 0.000 | 0.435 | 0.611 | 0.652 | 0.025 |
| BZA                   | dCPB7 | 0.078                   | 0.002 | 0.085 | 0.002 | 0.955 | 0.270 | 0.307 | 0.203 |
|                       | BZA   | 0.037                   | 0.037 | 0.045 | 0.001 | 0.467 | 0.026 | 0.220 | 0.062 |
| Dichloro BZA          | dCB1  | 0.065                   | 0.022 | 0.074 | 0.007 | 0.430 | 0.045 | 0.164 | 0.027 |
|                       | dCB2  | 0.032                   | 0.017 | 0.132 | 0.011 | 0.613 | 0.236 | 0.448 | 0.033 |
|                       | dCB3  | 0.074                   | 0.007 | 0.040 | 0.005 | 0.318 | 0.145 | 0.146 | 0.034 |
| Difluoro BZA          | dFB1  | 0.063                   | 0.005 | 0.049 | 0.007 | 0.304 | 0.083 | 0.312 | 0.013 |
|                       | dFB2  | 0.065                   | 0.029 | 0.081 | 0.004 | 0.350 | 0.017 | 0.190 | 0.051 |
|                       | dFB3  | 0.279                   | 0.013 | 0.050 | 0.001 | 0.306 | 0.060 | 0.176 | 0.004 |
| Chlorofluoro BZA      | CFB   | 0.064                   | 0.016 | 0.056 | 0.004 | 0.168 | 0.088 | 0.183 | 0.010 |

## Biofilm P-values: DIF vs. Analogues

**Supplemental Table S3.** Student's t-test P-values reveal compounds that perform significantly better than DIF. P-values of DIF vs. structural analogues in hemolysis (A), proteolysis (B) and biofilm (C) assays were calculated for significantly different impacts. Values highlighted in green indicate significantly decreased ( $P < 0.05$ ) virulence phenotypes as compared to DIF, whereas values highlighted in red indicate significantly increased ( $P < 0.05$ ) virulence phenotypes.

**Chan et al. Supplemental Table S4A – DIF and structural analogues differentially mitigate virulence in *S. aureus***

| Compound Name                                                      | Structure & M.W.                                                                             | % Hemolysis (H) / Proteolysis (P) / Biofilm (B) vs. Control (SD) |                        |                        |                        |                        |                        |                       |                        |                        |
|--------------------------------------------------------------------|----------------------------------------------------------------------------------------------|------------------------------------------------------------------|------------------------|------------------------|------------------------|------------------------|------------------------|-----------------------|------------------------|------------------------|
|                                                                    |                                                                                              |                                                                  | MSSA                   | COL                    | LAC                    | MW2                    | Mu3                    | Mu50                  | C15                    | C16                    |
| <b>Diflunisal</b><br>2-hydroxy-5-(2,4-difluorophenyl) benzoic acid | 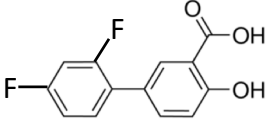<br>250.2   | H                                                                | 41.6<br>[27.8]         | 66.9<br>[35.8]         | 86.2<br>[18.7]         | 65.7<br>[25.0]         | 87.6<br>[23.3]         | 81.0<br>[36.7]        | 73.4<br>[18.7]         | 81.9<br>[27.8]         |
|                                                                    |                                                                                              | P                                                                | 0.0<br>[0]             | 0.0<br>[0]             | 0.0<br>[0]             | 0.0<br>[0]             | 0.0<br>[0]             | 0.0<br>[0]            | 0.0<br>[0]             | 0.0<br>[0]             |
|                                                                    |                                                                                              | B                                                                | 64.4<br>[20.4]         | 46.3<br>[2.9]          | 17.3<br>[9.5]          | 8.9<br>[2.6]           | 63.0<br>[33.8]         | 72.9<br>[7.1]         | 65.1<br>[3.4]          | 45.1<br>[14.7]         |
| <b>OHPB1</b><br>2-Hydroxy-4-phenylbenzoic acid                     | <br>214.2   | H                                                                | 37.7<br>[56.5]         | 89.6<br>[0.2]          | 89.5<br>[19.0]         | 170.9<br>[66.5]        | 89.0<br>[43.4]         | 84.2<br>[27.1]        | 93.2<br>[15.7]         | 100.0<br>[28.3]        |
|                                                                    |                                                                                              | P                                                                | 0.0<br>[0]             | 0.0<br>[0]             | 15.5<br>[20.3]         | 0.0<br>[0]             | 0.0<br>[0]             | 3.3<br>[2.9]          | 12.7<br>[22.0]         | 8.1<br>[14.1]          |
|                                                                    |                                                                                              | B                                                                | 79.8<br>[11.9]         | <b>84.9</b><br>[10.7]  | 99.4<br>[47.6]         | <b>81.2</b><br>[17.3]  | 85.3<br>[20.8]         | 73.7<br>[23.0]        | 73.7<br>[27.0]         | <b>99.1</b><br>[14.9]  |
| <b>OHPB2</b><br>2-Hydroxy-5-phenylbenzoic acid                     | <br>214.2  | H                                                                | 135.4<br>[26.3]        | 103.2<br>[0.5]         | 102.1<br>[13.9]        | 203.8<br>[71.4]        | 107.0<br>[43.7]        | 91.4<br>[20.4]        | <b>95.5</b><br>[16.0]  | 96.5<br>[20.5]         |
|                                                                    |                                                                                              | P                                                                | 0.0<br>[0]             | 0.0<br>[0]             | 0.0<br>[0]             | 0.0<br>[0]             | 0.0<br>[0]             | 3.0<br>[4.3]          | 0.0<br>[0]             | 0.0<br>[0]             |
|                                                                    |                                                                                              | B                                                                | <b>293.2</b><br>[59.0] | <b>106.9</b><br>[10.1] | 75.8<br>[31.7]         | <b>86.6</b><br>[15.5]  | 97.6<br>[14.4]         | 92.0<br>[15.9]        | 91.1<br>[15.9]         | 106.4<br>[27.4]        |
| <b>FPB1</b><br>4-(2-fluorophenyl) benzoic acid                     | <br>216.2 | H                                                                | 56.5<br>[32.3]         | 76.8<br>[41.0]         | 106.9<br>[26.5]        | 127.2<br>[92.1]        | 114.1<br>[33.7]        | 101.2<br>[44.6]       | <b>110.4</b><br>[24.4] | 110.5<br>[29.3]        |
|                                                                    |                                                                                              | P                                                                | 316.9<br>[627]         | <b>230.0</b><br>[48.5] | <b>148.5</b><br>[77.2] | <b>208.0</b><br>[182]  | 41.3<br>[47.3]         | <b>126.0</b><br>[101] | <b>144.3</b><br>[85.6] | <b>104.7</b><br>[40.2] |
|                                                                    |                                                                                              | B                                                                | 85.9<br>[30.8]         | 54.6<br>[6.3]          | <b>27.8</b><br>[11.3]  | <b>19.0</b><br>[2.8]   | <b>102.1</b><br>[40.6] | <b>92.3</b><br>[6.0]  | 77.9<br>[4.2]          | 76.4<br>[18.0]         |
| <b>dFPB1</b><br>3-(2,4-difluorophenyl) benzoic acid                | <br>234.2 | H                                                                | 55.9<br>[27.7]         | <b>53.8</b><br>[32.0]  | 85.9<br>[16.4]         | 63.2<br>[24.1]         | 79.7<br>[24.8]         | 71.3<br>[37.7]        | 77.9<br>[15.9]         | <b>71.8</b><br>[27.5]  |
|                                                                    |                                                                                              | P                                                                | 37.4<br>[91.5]         | <b>147.5</b><br>[48.5] | <b>109.0</b><br>[49.3] | <b>126.0</b><br>[42.3] | 0.0<br>[0]             | 116.7<br>[234]        | <b>119.1</b><br>[27.1] | <b>121.3</b><br>[38.6] |
|                                                                    |                                                                                              | B                                                                | 78.0<br>[18.6]         | <b>53.3</b><br>[2.9]   | <b>24.2</b><br>[11.1]  | <b>25.9</b><br>[6.6]   | 101.9<br>[53.5]        | <b>103.1</b><br>[7.8] | <b>100.9</b><br>[10.8] | 95.7<br>[28.2]         |
| <b>dFPB2</b><br>4-(2,4-difluorophenyl) benzoic acid                | <br>234.2 | H                                                                | 74.4<br>[46.5]         | 50.3<br>[45.5]         | 85.0<br>[14.6]         | 79.9<br>[21.9]         | 64.4<br>[26.3]         | 67.2<br>[38.4]        | 83.3<br>[29.7]         | 74.8<br>[30.7]         |
|                                                                    |                                                                                              | P                                                                | 159.5<br>[236]         | <b>142.9</b><br>[115]  | <b>131.4</b><br>[71.2] | <b>122.2</b><br>[81.2] | <b>58.5</b><br>[27.6]  | <b>186.9</b><br>[178] | <b>117.3</b><br>[41.6] | <b>121.9</b><br>[51.4] |
|                                                                    |                                                                                              | B                                                                | 74.8<br>[20.3]         | <b>72.6</b><br>[7.6]   | <b>48.1</b><br>[8.3]   | 26.2<br>[11.2]         | <b>106.1</b><br>[45.1] | <b>98.0</b><br>[6.9]  | 101.6<br>[24.0]        | 84.2<br>[25.9]         |

**Supplemental Table S4.** Hemolysis (H), proteolysis (P) and biofilm (B) for DIF and structural analogues are represented as percent of control. Mean values and standard deviation (SD) for DIF and each analogues are shown for DIF and each structural analogue. Values of structural analogues that significantly ( $P < 0.05$ ; student's t-test) differed from DIF are indicated in bold font.

**Chan et al. Supplemental Table S4B – DIF and structural analogues differentially mitigate virulence in *S. aureus***

| Compound Name                                       | Structure & M.W.                                                                             | % Hemolysis (H) / Proteolysis (P) vs. Control (St. Dev.) |                 |                 |                 |                 |                 |                 |                 |                 |
|-----------------------------------------------------|----------------------------------------------------------------------------------------------|----------------------------------------------------------|-----------------|-----------------|-----------------|-----------------|-----------------|-----------------|-----------------|-----------------|
|                                                     |                                                                                              |                                                          | MSSA            | COL             | LAC             | MW2             | Mu3             | Mu50            | C15             | C16             |
| <b>dFPB3</b><br>2-(2,4-difluorophenyl) benzoic acid | 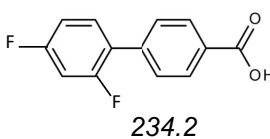<br>234.2   | H                                                        | 77.2<br>[27.5]  | 108.9<br>[37.7] | 105.1<br>[15.4] | 165.6<br>[142]  | 121.0<br>[39.1] | 122.1<br>[68.7] | 105.2<br>[14.7] | 112.1<br>[35.0] |
|                                                     |                                                                                              | P                                                        | 137.0<br>[137]  | 114.8<br>[51.2] | 97.8<br>[19.0]  | 70.2<br>[17.6]  | 84.3<br>[22.1]  | 193.8<br>[115]  | 120.0<br>[26.2] | 123.8<br>[37.8] |
|                                                     |                                                                                              | B                                                        | 89.1<br>[23.8]  | 83.4<br>[10.2]  | 91.2<br>[52.1]  | 101.6<br>[43.7] | 145.5<br>[76.2] | 120.7<br>[11.7] | 142.8<br>[12.2] | 102.3<br>[32.0] |
| <b>dFPB4</b><br>4-(3,5-difluorophenyl) benzoic acid | <br>234.2   | H                                                        | 60.7<br>[37.1]  | 86.8<br>[40.4]  | 94.5<br>[12.1]  | 60.9<br>[22.7]  | 82.6<br>[35.5]  | 79.8<br>[50.7]  | 92.6<br>[25.1]  | 87.8<br>[44.8]  |
|                                                     |                                                                                              | P                                                        | 0.0<br>[0.0]    | 257.5<br>[92.9] | 131.0<br>[31.5] | 147.4<br>[42.6] | 18.9<br>[26.2]  | 126.9<br>[170]  | 177.3<br>[187]  | 83.7<br>[48.6]  |
|                                                     |                                                                                              | B                                                        | 86.3<br>[38.4]  | 59.3<br>[2.0]   | 28.5<br>[10.4]  | 14.6<br>[7.9]   | 89.3<br>[43.7]  | 87.0<br>[7.6]   | 89.4<br>[16.5]  | 75.2<br>[17.3]  |
| <b>dFPB5</b><br>4-(2,3-difluorophenyl) benzoic acid | <br>234.2  | H                                                        | 66.1<br>[40.2]  | 82.2<br>[44.5]  | 109.6<br>[17.2] | 88.2<br>[36]    | 126.5<br>[34.9] | 106.5<br>[49.5] | 104.5<br>[5.5]  | 104.1<br>[33.9] |
|                                                     |                                                                                              | P                                                        | 120.1<br>[294]  | 236.7<br>[115]  | 132.4<br>[27.8] | 172.9<br>[56.5] | 41.8<br>[38.7]  | 157.9<br>[184]  | 157.8<br>[109]  | 199.4<br>[219]  |
|                                                     |                                                                                              | B                                                        | 90.4<br>[10.7]  | 64.7<br>[3.3]   | 37.8<br>[19.2]  | 19.6<br>[8.8]   | 132.5<br>[41.8] | 101.5<br>[2.3]  | 108.1<br>[16.2] | 89.1<br>[17.1]  |
| <b>dFPB6</b><br>4-(2,6-difluorophenyl) benzoic acid | <br>234.2 | H                                                        | 102.8<br>[40.7] | 79.6<br>[38.6]  | 126.0<br>[19.4] | 145.9<br>[52.8] | 142.1<br>[49.6] | 118.0<br>[46.7] | 114.3<br>[19.4] | 127.7<br>[59.7] |
|                                                     |                                                                                              | P                                                        | 417.1<br>[929]  | 213.5<br>[96.6] | 134.3<br>[31.0] | 185.1<br>[86.4] | 72.0<br>[40.2]  | 223.9<br>[202]  | 134.0<br>[57.7] | 107.2<br>[39.6] |
|                                                     |                                                                                              | B                                                        | 92.1<br>[32.6]  | 76.6<br>[6.8]   | 75.2<br>[40.2]  | 34.7<br>[3.3]   | 128.3<br>[60.5] | 100.8<br>[9.4]  | 78.2<br>[5.7]   | 62.6<br>[11.1]  |
| <b>dFPP1</b><br>3-(2,4-difluorophenyl) phenol       | <br>206.2 | H                                                        | 48.0<br>[46.3]  | 57.3<br>[48.9]  | 110.5<br>[23.3] | 70.2<br>[48.9]  | 105.8<br>[45.3] | 104.1<br>[62.6] | 90.3<br>[27.0]  | 89.1<br>[50.0]  |
|                                                     |                                                                                              | P                                                        | 93.2<br>[166]   | 125.5<br>[48.3] | 126.8<br>[23.7] | 78.7<br>[34.6]  | 71.6<br>[28.2]  | 205.3<br>[167]  | 100.3<br>[35.5] | 79.7<br>[39.3]  |
|                                                     |                                                                                              | B                                                        | 48.8<br>[14.4]  | 65.0<br>[3.0]   | 45.7<br>[28.4]  | 11.5<br>[2.5]   | 58.8<br>[31.1]  | 87.5<br>[5.4]   | 70.6<br>[10.0]  | 43.8<br>[13.0]  |
| <b>dFPP2</b><br>3-(2,3-difluorophenyl) phenol       | <br>206.2 | H                                                        | 64.2<br>[29.2]  | 45.6<br>[37.1]  | 102.0<br>[15.2] | 76.1<br>[37.7]  | 90.0<br>[48.9]  | 90.5<br>[57.1]  | 88.6<br>[19.9]  | 77.2<br>[42.8]  |
|                                                     |                                                                                              | P                                                        | 101.4<br>[201]  | 124.6<br>[51.3] | 109.2<br>[24.3] | 65.5<br>[22.0]  | 74.1<br>[23.2]  | 169.7<br>[111]  | 92.1<br>[28.3]  | 74.2<br>[42.6]  |
|                                                     |                                                                                              | B                                                        | 8.3<br>[3.0]    | 102.3<br>[13.5] | 26.3<br>[17.2]  | 18.2<br>[4.4]   | 108.4<br>[61.7] | 150.4<br>[51.3] | 53.4<br>[9.2]   | 51.3<br>[13.8]  |

**Supplemental Table S4.** Hemolysis (H), proteolysis (P) and biofilm (B) for DIF and structural analogues are represented as percent of control. Mean values and standard deviation (SD) for DIF and each analogues are shown for DIF and each structural analogue. Values of structural analogues that significantly ( $P < 0.05$ ; student's t-test) differed from DIF are indicated in bold font.



**Chan et al. Supplemental Table S4C – DIF and structural analogues differentially mitigate virulence in *S. aureus***

| Compound Name                                       | Structure & M.W.                                                                             | % Hemolysis (H) / Proteolysis (P) vs. Control (St. Dev.) |                        |                        |                       |                       |                       |                       |                        |                        |
|-----------------------------------------------------|----------------------------------------------------------------------------------------------|----------------------------------------------------------|------------------------|------------------------|-----------------------|-----------------------|-----------------------|-----------------------|------------------------|------------------------|
|                                                     |                                                                                              |                                                          | MSSA                   | COL                    | LAC                   | MW2                   | Mu3                   | Mu50                  | C15                    | C16                    |
| <b>dCPB1</b><br>2-(3,5-dichlorophenyl) benzoic acid | 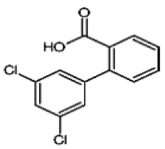<br>267.1   | H                                                        | 59.7<br>[41.6]         | 94.4<br>[42.4]         | 107.2<br>[29.2]       | 81.4<br>[37.9]        | 108.9<br>[56.8]       | 117.2<br>[72.1]       | <b>108.6</b><br>[28.4] | 112.0<br>[51.8]        |
|                                                     |                                                                                              | P                                                        | 305.6<br>[749]         | <b>59.7</b><br>[30.2]  | <b>72.2</b><br>[26.5] | 22.1<br>[27.6]        | 0.0<br>[0.0]          | 30.4<br>[33.8]        | <b>83.2</b><br>[32.4]  | 27.0<br>[34.7]         |
|                                                     |                                                                                              | B                                                        | 95.6<br>[25.8]         | 55.6<br>[3.0]          | 63.3<br>[32.5]        | 9.5<br>[2.8]          | 56.9<br>[21.7]        | <b>89.8</b><br>[7.4]  | 69.4<br>[8.9]          | 75.9<br>[34.9]         |
| <b>dCPB2</b><br>3-(3,5-dichlorophenyl) benzoic acid | <br>267.1   | H                                                        | 19.1<br>[21.2]         | 27.4<br>[28.7]         | <b>58.2</b><br>[21.4] | 45.8<br>[28.8]        | <b>51.2</b><br>[23.4] | <b>46.6</b><br>[20.1] | <b>54.7</b><br>[10.5]  | <b>56.4</b><br>[37.8]  |
|                                                     |                                                                                              | P                                                        | 0.0<br>[0.0]           | 3.2<br>[7.8]           | 12.2<br>[21.3]        | 0.0<br>[0.0]          | 0.0<br>[0.0]          | 0.0<br>[0.0]          | 10.1<br>[19.4]         | 2.0<br>[4.8]           |
|                                                     |                                                                                              | B                                                        | <b>3.6</b><br>[1.2]    | 44.5<br>[4.0]          | <b>30.6</b><br>[10.8] | <b>6.0</b><br>[2.3]   | 48.7<br>[19.8]        | 74.0<br>[8.6]         | 61.1<br>[4.4]          | <b>36.1</b><br>[14.7]  |
| <b>dCPB3</b><br>4-(3,5-dichlorophenyl) benzoic acid | <br>267.1   | H                                                        | 50.2<br>[25.7]         | 44.4<br>[25.5]         | 96.1<br>[24.9]        | 57.2<br>[32.5]        | 79.6<br>[37.7]        | 71.4<br>[47.0]        | 83.5<br>[18.7]         | 82.7<br>[40.9]         |
|                                                     |                                                                                              | P                                                        | 0.0<br>[0.0]           | 0.0<br>[0.0]           | 8.9<br>[14.1]         | 6.0<br>[14.6]         | 0.0<br>[0.0]          | 0.0<br>[0.0]          | 0.0<br>[0.0]           | 0.0<br>[0.0]           |
|                                                     |                                                                                              | B                                                        | 55.8<br>[20.4]         | 49.2<br>[4.0]          | 16.4<br>[6.2]         | 7.4<br>[2.4]          | 57.7<br>[21.0]        | <b>82.0</b><br>[7.5]  | 48.5<br>[7.3]          | 39.4<br>[15.2]         |
| <b>dCPB4</b><br>3-(2,5-dichlorophenyl) benzoic acid | <br>267.1 | H                                                        | 29.2<br>[22.7]         | 35.8<br>[24.3]         | <b>69.1</b><br>[10.4] | 59.5<br>[40.0]        | 63.7<br>[28.5]        | <b>48.8</b><br>[29.2] | <b>56.5</b><br>[6.5]   | <b>51.3</b><br>[18.5]  |
|                                                     |                                                                                              | P                                                        | 0.0<br>[0.0]           | 20.5<br>[45.7]         | 8.1<br>[18.2]         | 0.0<br>[0.0]          | 0.0<br>[0.0]          | 0.7<br>[1.5]          | 6.5<br>[14.6]          | 0.0<br>[0.0]           |
|                                                     |                                                                                              | B                                                        | 37.9<br>[6.8]          | 50.1<br>[1.9]          | 19.1<br>[9.0]         | 9.0<br>[3.2]          | 82.6<br>[40.3]        | 76.1<br>[7.7]         | 69.2<br>[4.5]          | 41.4<br>[11.9]         |
| <b>dCPB5</b><br>4-(2,3-dichlorophenyl) benzoic acid | <br>267.1 | H                                                        | 52.6<br>[46.6]         | 77.4<br>[7.9]          | 82.9<br>[20.7]        | 132.7<br>[39.4]       | 70.3<br>[32.7]        | 77.8<br>[22.2]        | 85.0<br>[28.7]         | 99.6<br>[21.4]         |
|                                                     |                                                                                              | P                                                        | 0.0<br>[0.0]           | 100.1<br>[56.0]        | <b>86.2</b><br>[10.7] | <b>92.8</b><br>[24.0] | 0.0<br>[0.0]          | 0.0<br>[0.0]          | 20.4<br>[11.6]         | 17.1<br>[9.9]          |
|                                                     |                                                                                              | B                                                        | <b>416.4</b><br>[52.5] | <b>124.4</b><br>[18.7] | <b>62.4</b><br>[17.3] | <b>88.0</b><br>[15.1] | 97.1<br>[26.0]        | 74.7<br>[21.2]        | 61.6<br>[15.3]         | <b>107.1</b><br>[22.7] |
| <b>dCPB6</b><br>4-(2,5-dichlorophenyl) benzoic acid | <br>267.1 | H                                                        | <b>26.1</b><br>[37.8]  | 41.7<br>[59.0]         | 79.1<br>[35.3]        | 158.4<br>[55.7]       | 75.8<br>[34.8]        | 75.5<br>[35.6]        | 79.7<br>[28.2]         | 75.2<br>[26.3]         |
|                                                     |                                                                                              | P                                                        | 0.0<br>[0.0]           | 24.3<br>[23.4]         | <b>66.8</b><br>[18.9] | 52.8<br>[32.1]        | 0.0<br>[0.0]          | 12.2<br>[12.0]        | 13.9<br>[15.1]         | 2.7<br>[4.6]           |
|                                                     |                                                                                              | B                                                        | <b>335.9</b><br>[60.7] | 123.9<br>[36.1]        | 55.2<br>[21.9]        | <b>78.5</b><br>[18.0] | 103.2<br>[25.7]       | 69.1<br>[15.6]        | 64.7<br>[21.8]         | <b>98.5</b><br>[15.5]  |

**Supplemental Table S4.** Hemolysis (H), proteolysis (P) and biofilm (B) for DIF and structural analogues are represented as percent of control. Mean values and standard deviation (SD) for DIF and each analogues are shown for DIF and each structural analogue. Values of structural analogues that significantly ( $P < 0.05$ ; student's t-test) differed from DIF are indicated in bold font.



**Chan et al. Supplemental Table S4D – DIF and structural analogues differentially mitigate virulence in *S. aureus***

| Compound Name                                          | Structure & M.W.                                                                             | % Hemolysis (H) / Proteolysis (P) vs. Control (St. Dev.) |                        |                        |                        |                        |                 |                        |                        |                        |
|--------------------------------------------------------|----------------------------------------------------------------------------------------------|----------------------------------------------------------|------------------------|------------------------|------------------------|------------------------|-----------------|------------------------|------------------------|------------------------|
|                                                        |                                                                                              |                                                          | MSSA                   | COL                    | LAC                    | MW2                    | Mu3             | Mu50                   | C15                    | C16                    |
| <b>dCPB7</b><br>3-(2,4-dichlorophenyl)<br>benzoic acid | 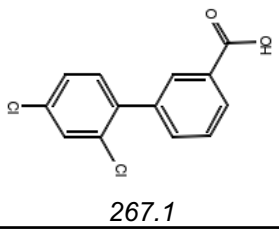<br>267.1   | H                                                        | <b>24.5</b><br>[35.3]  | 68.0<br>[13.3]         | 68.2<br>[9.6]          | 167.8<br>[71.9]        | 72.2<br>[24.2]  | 67.1<br>[29.8]         | 71.8<br>[11.8]         | 62.4<br>[35.6]         |
|                                                        |                                                                                              | P                                                        | 0.0<br>[0.0]           | <b>49.6</b><br>[5.4]   | <b>39.3</b><br>[13.3]  | <b>55.4</b><br>[17.2]  | 0.0<br>[0.0]    | 0.0<br>[0.0]           | 22.9<br>[20.0]         | 22.5<br>[19.8]         |
|                                                        |                                                                                              | B                                                        | 99.8<br>[13.6]         | <b>120.7</b><br>[10.6] | 56.8<br>[19.0]         | <b>62.8</b><br>[21.6]  | 66.7<br>[12.7]  | 54.6<br>[12.2]         | 49.2<br>[13.0]         | 67.7<br>[15.6]         |
| <b>BZA</b><br>Benzoic Acid                             | <br>122.1   | H                                                        | <b>147.3</b><br>[26.2] | 127.9<br>[21.0]        | 100.0<br>[14.3]        | <b>168.5</b><br>[53.4] | 105.1<br>[18.4] | 90.6<br>[16.4]         | <b>102.3</b><br>[20.1] | 114.4<br>[7.6]         |
|                                                        |                                                                                              | P                                                        | 127.6<br>[0.0]         | <b>112.6</b><br>[34.0] | <b>107.0</b><br>[15.5] | <b>125.2</b><br>[19.5] | 105.4<br>[66.2] | <b>109.7</b><br>[28.4] | 88.0<br>[43.7]         | 109.0<br>[60.9]        |
|                                                        |                                                                                              | B                                                        | <b>129.8</b><br>[12.9] | <b>107.8</b><br>[16.6] | <b>89.9</b><br>[35.2]  | <b>103.8</b><br>[17.9] | 95.8<br>[23.3]  | <b>135.0</b><br>[36.2] | 109.1<br>[35.1]        | 143.3<br>[55.5]        |
| <b>dCB1</b><br>2,4-Dichlorobenzoic acid                | <br>191.0  | H                                                        | <b>146.1</b><br>[18.4] | 115.0<br>[20.2]        | 106.1<br>[10.5]        | 159.6<br>[40.2]        | 105.2<br>[48.0] | 81.3<br>[11.8]         | 96.9<br>[13.0]         | 105.5<br>[30.7]        |
|                                                        |                                                                                              | P                                                        | 44.6<br>[0.0]          | 94.6<br>[38.1]         | <b>96.0</b><br>[22.3]  | <b>100.8</b><br>[26.8] | 51.5<br>[49.1]  | <b>113.7</b><br>[43.5] | 86.3<br>[40.8]         | 81.2<br>[45.5]         |
|                                                        |                                                                                              | B                                                        | 143.3<br>[33.6]        | <b>124.4</b><br>[15.0] | 116.4<br>[62.8]        | <b>114.8</b><br>[14.8] | 94.9<br>[17.8]  | <b>119.4</b><br>[17.7] | 90.9<br>[23.3]         | <b>110.9</b><br>[26.9] |
| <b>dCB2</b><br>3,4-Dichlorobenzoic acid                | <br>191.0 | H                                                        | 143.0<br>[36.6]        | 115.2<br>[0.2]         | 102.2<br>[24.4]        | <b>164.9</b><br>[34.8] | 90.5<br>[62.1]  | 88.0<br>[23.1]         | <b>94.2</b><br>[17.6]  | 98.8<br>[22.2]         |
|                                                        |                                                                                              | P                                                        | 82.9<br>[0.0]          | <b>100.5</b><br>[13.8] | <b>105.2</b><br>[17.2] | <b>150.7</b><br>[54.6] | 16.2<br>[16.6]  | <b>95.2</b><br>[29.2]  | 79.0<br>[36.9]         | 104.9<br>[59.5]        |
|                                                        |                                                                                              | B                                                        | <b>110.2</b><br>[20.9] | <b>83.4</b><br>[12.9]  | 163.1<br>[85.8]        | <b>104.1</b><br>[35.4] | 103.8<br>[48.7] | 117.7<br>[52.8]        | 76.7<br>[25.0]         | <b>127.2</b><br>[37.6] |
| <b>dCB3</b><br>2,5-Dichlorobenzoic acid                | <br>191.0 | H                                                        | <b>139.7</b><br>[25.7] | 90.7<br>[34.0]         | 93.8<br>[23.1]         | <b>128.6</b><br>[15.3] | 89.8<br>[36.7]  | 86.5<br>[30.4]         | <b>105.3</b><br>[13.2] | 98.0<br>[32.4]         |
|                                                        |                                                                                              | P                                                        | 19.1<br>[0.0]          | <b>136.2</b><br>[54.8] | <b>89.4</b><br>[10.9]  | <b>115.8</b><br>[22.2] | 95.8<br>[62.5]  | <b>135.5</b><br>[22.9] | 103.8<br>[49.3]        | 118.1<br>[91.9]        |
|                                                        |                                                                                              | B                                                        | 116.7<br>[12.5]        | <b>131.2</b><br>[14.0] | <b>164.0</b><br>[50.6] | <b>122.4</b><br>[26.9] | 100.5<br>[13.3] | 118.4<br>[33.3]        | 101.2<br>[23.0]        | <b>104.6</b><br>[20.2] |

**Supplemental Table S4.** Hemolysis (H), proteolysis (P) and biofilm (B) for DIF and structural analogues are represented as percent of control. Mean values and standard deviation (SD) for DIF and each analogues are shown for DIF and each structural analogue. Values of structural analogues that significantly ( $P < 0.05$ ; student's t-test) differed from DIF are indicated in bold font.

**Chan et al. Supplemental Table S4E – DIF and structural analogues differentially mitigate virulence in *S. aureus***

| Compound Name                               | Structure & M.W.                                                                                        | % Hemolysis (H) / Proteolysis (P) vs. Control (St. Dev.) |                               |                               |                               |                               |                 |                               |                               |                               |
|---------------------------------------------|---------------------------------------------------------------------------------------------------------|----------------------------------------------------------|-------------------------------|-------------------------------|-------------------------------|-------------------------------|-----------------|-------------------------------|-------------------------------|-------------------------------|
|                                             |                                                                                                         |                                                          | MSSA                          | COL                           | LAC                           | MW2                           | Mu3             | Mu50                          | C15                           | C16                           |
| <b>dFB1</b><br>2,6-Difluorobenzoic acid     | 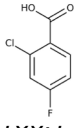<br><br><i>158.1</i>   | H                                                        | <b>179.9</b><br><b>[32.8]</b> | 153.2<br>[55.5]               | 103.1<br>[18.2]               | 203.1<br>[62.8]               | 101.6<br>[57.1] | 94.6<br>[23.2]                | 106.2<br>[25.6]               | 113.3<br>[24.4]               |
|                                             |                                                                                                         | P                                                        | 68.6<br>[0.0]                 | 117.2<br>[50.4]               | <b>103.6</b><br><b>[13.2]</b> | <b>106.4</b><br><b>[13.9]</b> | 106.6<br>[78.3] | 99.7<br>[43.9]                | 81.1<br>[54.2]                | 99.3<br>[73.2]                |
|                                             |                                                                                                         | B                                                        | 142.9<br>[26.6]               | <b>156.3</b><br><b>[41.5]</b> | <b>231.0</b><br><b>[75.2]</b> | <b>133.4</b><br><b>[13.8]</b> | 93.9<br>[9.7]   | 125.5<br>[36.3]               | 86.9<br>[31.7]                | <b>107.3</b><br><b>[16.8]</b> |
| <b>dFB2</b><br>2,3-Difluorobenzoic acid     | <br><br><i>158.1</i>   | H                                                        | <b>157.7</b><br><b>[24.5]</b> | 114.3<br>[3.3]                | 109.8<br>[13.7]               | 159.7<br>[26.2]               | 103.7<br>[22.9] | 83.3<br>[14.2]                | 109.7<br>[27.2]               | 129.8<br>[23.2]               |
|                                             |                                                                                                         | P                                                        | 110.9<br>[0.0]                | <b>118.7</b><br><b>[38.7]</b> | <b>105.1</b><br><b>[7.3]</b>  | <b>111.1</b><br><b>[20.2]</b> | 92.6<br>[75.8]  | <b>114.0</b><br><b>[8.7]</b>  | 83.6<br>[34.9]                | 107.9<br>[55.1]               |
|                                             |                                                                                                         | B                                                        | 129.1<br>[19.3]               | <b>108.6</b><br><b>[18.4]</b> | 234.4<br>[110]                | <b>135.1</b><br><b>[28.2]</b> | 110.1<br>[36.]  | <b>137.4</b><br><b>[14.7]</b> | 101.9<br>[30.9]               | 121.3<br>[34.4]               |
| <b>dFB3</b><br>2,4-Difluorobenzoic acid     | <br><br><i>158.1</i>  | H                                                        | <b>150.4</b><br><b>[2.0]</b>  | 120.5<br>[11.1]               | 110.0<br>[11.1]               | <b>174.1</b><br><b>[35.9]</b> | 116.8<br>[37.1] | 87.0<br>[18.3]                | <b>101.2</b><br><b>[17.9]</b> | 110.1<br>[17.2]               |
|                                             |                                                                                                         | P                                                        | 128.2<br>[0.0]                | <b>140.8</b><br><b>[44.5]</b> | <b>114.6</b><br><b>[12.4]</b> | <b>131.1</b><br><b>[16.6]</b> | 103.8<br>[65.1] | <b>109.3</b><br><b>[10.4]</b> | <b>91.0</b><br><b>[21.5]</b>  | <b>108.4</b><br><b>[38.5]</b> |
|                                             |                                                                                                         | B                                                        | 87.9<br>[14.1]                | <b>143.8</b><br><b>[25.2]</b> | <b>81.1</b><br><b>[34.6]</b>  | <b>106.9</b><br><b>[10.5]</b> | 118.8<br>[37.0] | 125.1<br>[29.6]               | 92.2<br>[20.5]                | <b>125.6</b><br><b>[6.3]</b>  |
| <b>CFB</b><br>2-Chloro-4-fluorobenzoic acid | <br><br><i>174.6</i> | H                                                        | <b>153.7</b><br><b>[32.2]</b> | 113.9<br>[6.7]                | 109.4<br>[14.1]               | 176.5<br>[33.7]               | 118.5<br>[33.3] | 103.1<br>[20.9]               | 115.5<br>[29.5]               | 122.8<br>[25.5]               |
|                                             |                                                                                                         | P                                                        | 114.8<br>[0.0]                | <b>109.3</b><br><b>[20.9]</b> | <b>100.2</b><br><b>[20.8]</b> | <b>120.0</b><br><b>[25.7]</b> | 104.5<br>[82.0] | <b>130.6</b><br><b>[19.8]</b> | <b>92.8</b><br><b>[35.1]</b>  | 110.4<br>[54.7]               |
|                                             |                                                                                                         | B                                                        | 136.2<br>[28.0]               | <b>220.7</b><br><b>[54.0]</b> | 210.0<br>[80.4]               | <b>131.5</b><br><b>[16.8]</b> | 125.6<br>[36.0] | 133.2<br>[39.4]               | 113.8<br>[33.7]               | <b>147.7</b><br><b>[21.3]</b> |

**Supplemental Table S4.** Hemolysis (H), proteolysis (P) and biofilm (B) for DIF and structural analogues are represented as percent of control. Mean values and standard deviation (SD) for DIF and each analogues are shown for DIF and each structural analogue. Values of structural analogues that significantly ( $P < 0.05$ ; student's t-test) differed from DIF are indicated in bold font.
